# Supplementary material for: Secretion and endocytosis in subapical cells support hyphal tip growth in the fungus Trichoderma reesei
Source: Springer Nature journal article supplement (doi:10.1038/s41467-025-59606-4), 2025-05-12
Supplement: MOESM1 [file 41467_2025_59606_MOESM1_ESM.pdf]

## Supplementary Information

**Title:** Secretion and endocytosis in subapical cells support hyphal tip growth in the fungus *Trichoderma reesei*

**Authors:** Schuster, M., Kilaru, S., Wösten, H. A. B., Steinberg, G.

### Contents

#### Supplementary Tables

Supp. Table 1: Strains and their experimental usage.

Supp. Table 2: Plasmids used in this study.

Supp. Table 3: Hyphal "core growth units" in filamentous ascomycetes.

Supp. Table 4: Amino acid sequence analysis of predicted *T. reesei* proteins.

Supp. Table 5: Primers used in this study.

#### Supplementary Figures and Figure Legends

Supp. Figure 1: Organisation of the cloning vectors.

Supp. Figure 2: Re-establishment of a growing tip cell after laser injury of the 1<sup>st</sup> cell.

Supp. Figure 3: Response of *T. reesei* tip cells to laser injury of the 2<sup>nd</sup> cell.

Supp. Figure 4: Mitotic spindles in subapical cells and MT nucleation at septa.

Supp. Figure 5: Motility of a SVs in *T. reesei* hyphal cells.

Supp. Figure 6: Contrast-inverted kymograph of EE motility.

Supp. Figure 7: Analysis of anterograde and retrograde cross-septum EE motility.

Supp. Figure 8: The ER and the Golgi complex in apical and subapical hyphal cells.

Supp. Figure 9: Motility of fluorescent 1,3- $\beta$ -glucan synthase and SVs and EEs.

Supp. Figure 10: Frequency of EE motility in  $\Delta Trhok1$  mutants.

#### Supplementary Methods

#### Supplementary References

## Supplementary Tables

**Supplementary Table 1** Strains and their experimental usage

| Name                                                  | Experimental usage                                                                                                                                  | Reference  |
|-------------------------------------------------------|-----------------------------------------------------------------------------------------------------------------------------------------------------|------------|
| QM6a_TrmsGSso1                                        | Fig.1a, 1e-i; Supp. Fig. 2; Supp. Fig. 3a, 3b; Supp. Movie 2                                                                                        | This study |
| QM6a                                                  | Fig. 1b; Fig. 9c, 9d                                                                                                                                | 1          |
| QM6a_TrmsChSso1_Hex1TrmsG                             | Fig. 1c, 1d; Supp. Movie 1                                                                                                                          | This study |
| QM6a_TrmsGRab5_TrmsChSso1                             | Fig. 1j, 1k; Fig. 2a-c; Fig. 5a-f; Fig. 9b; Supp. Fig. 6; Supp. Fig. 7; Supp. Fig. 10; Supp. Movie 4; Supp. Movie 9; Supp. Movie 10; Supp. Movie 11 | This study |
| QM6a_TrmsG_TrmsChSso1                                 | Fig. 2d, 2e; Supp. Movie 3                                                                                                                          | This study |
| QM6a_TrmsChSso1_TrmsGTub1                             | Fig. 3a-e; Supp. Fig. 4a-c; Supp. Movie5                                                                                                            | This study |
| QM6a_Lifeact-TreG                                     | Fig. 3f, 3g; Fig. 6b-f; Supp. Movie 12                                                                                                              | This study |
| QM6a_TrmsG <sub>2</sub> Sec4_TrmsChSso1               | Fig. 4a-f; Supp. Fig. 5; Supp. Movie 6; Supp. Movie 7; Supp. Movie 8                                                                                | This study |
| QM6a_TrmsChSso1                                       | Fig. 6a                                                                                                                                             | This study |
| QM6a_Cal <sup>s</sup> TreG-HDEL                       | Fig. 7a; Supp. Fig. 8a                                                                                                                              | This study |
| QM6a_Ktr1TreG                                         | Fig. 7b; Supp. Fig. 8b                                                                                                                              | This study |
| QM6a_TrmsChSso1_TrmsGSnc1                             | Fig. 7c,e,f,g; Supp. Movie 14                                                                                                                       | This study |
| QM6a_TrmsG <sub>2</sub> Sec4_TrmsChSnc1               | Fig. 7d; Supp. Movie 13                                                                                                                             | This study |
| QM6a_TreGExo70                                        | Fig. 7h                                                                                                                                             | This study |
| QM6a_TrmsCh <sub>2</sub> Gcs1_TrmsGSso1               | Fig. 8b, 8e-i                                                                                                                                       | This study |
| QM6a_TrmsG <sub>2</sub> Sec4_TrmsCh <sub>2</sub> Gcs1 | Fig. 8c; Supp. Fig. 9a; Supp. Movie 15                                                                                                              | This study |
| QM6a_TrmsCh <sub>2</sub> Gcs1_TrmsGRab5               | Fig. 8d; Supp. Fig. 9b; Supp. Movie 16; Supp. Movie 17                                                                                              | This study |
| QM6a_TrmsChSso1_paGGcs1                               | Fig. 8j, 8k                                                                                                                                         | This study |
| QM6a_ΔHok1_TrmsGRab5                                  | Fig. 9b; Supp. Fig. 10                                                                                                                              | This study |
| QM6a_ΔHok1                                            | Fig. 9c, 9d                                                                                                                                         | This study |

TrmsG: *T. reesei* codon-optimised monomeric superfolder green fluorescent protein; Sso1: a syntaxin-like plasma membrane protein; TrmsCh: *T. reesei* codon-optimised monomeric Cherry; Hex1: a major protein in Woronin bodies; Rab5: small endosomal GTPase; Tub1: α-tubulin; Lifeact : 17 residues from the actin binding protein ABP140p codon optimised for *T. reesei*; TreG: *T. reesei* codon optimised monomeric enhanced green fluorescent protein; Sec4: small GTPase; Cal<sup>s</sup>: Signal sequence of calreticulin from rabbit; HDEL: endoplasmic reticulum retention signal; Ktr1: α-1,2-mannosyltransferase, Snc1: synaptobrevin-like vSNARE protein; Exo70: exocyst subunit; Gcs1: glucan synthase; paG: photo-activatable monomeric green fluorescent protein; Δ: deletion; Hok1: Hook protein in *T. reesei*.

**Supplementary Table 2** Plasmids used in this study

| Name                            | Description                                               | Reference  |
|---------------------------------|-----------------------------------------------------------|------------|
| pTrCTrmsGFPSso1                 | <i>Ptub1-trmsgfp-ssso1, cbx<sup>R</sup></i>               | This study |
| pTrHTrmCherrySso1               | <i>Ptub1-trmCherry-ssso1, hyg<sup>R</sup></i>             | 2          |
| pTrCHex1TrmsGFP                 | <i>Ptub1-hex1-trmsgfp, cbx<sup>R</sup></i>                | This study |
| pTrCTrmsGFPRab5                 | <i>Ptub1-trmsgfp-rab5, cbx<sup>R</sup></i>                | This study |
| pTrCTrmsGFP                     | <i>Ptub1-trmsgfp, cbx<sup>R</sup></i>                     | 3          |
| pTrCTrmsGFPTub1                 | <i>Ptub1-trmsgfp-tub1, cbx<sup>R</sup></i>                | This study |
| pTrCLifeactTreGFP               | <i>Ptub1-lifeact-tregfp, cbx<sup>R</sup></i>              | This study |
| pTrHTrmsGFP <sub>2</sub> Sec4   | <i>Psec4- trmsgfp<sub>2</sub>-sec4, hyg<sup>R</sup></i>   | This study |
| pTrCTrmCherrySso1               | <i>Ptub1-trmCherry-ssso1, cbx<sup>R</sup></i>             | This study |
| pTrCCal <sup>S</sup> TreGFPHDEL | <i>Ptub1-cal<sup>S</sup>-tregfp-hdel, cbx<sup>R</sup></i> | This study |
| pTrHKtr1TreGFP                  | <i>Pktr1- ktr1- tregfp, hyg<sup>R</sup></i>               | This study |
| pTrCTrmsGFPSnc1                 | <i>Psnc1- trmsgfp-snc1, cbx<sup>R</sup></i>               | This study |
| pTrCTrmCherrySnc1               | <i>Psnc1- trmCherry-snc1, cbx<sup>R</sup></i>             | This study |
| pTrHTreGFPExo70                 | <i>Pexo70-tregfp-exo70, hyg<sup>R</sup></i>               | This study |
| pTrCTrmCherry <sub>2</sub> Gcs1 | <i>Pgcs1- trmCherry<sub>2</sub>-gcs1, cbx<sup>R</sup></i> | This study |
| pTrHTrmsGFPSso1                 | <i>Ptub1-trmsgfp-ssso1, hyg<sup>R</sup></i>               | This study |
| pTrHTrmsGFPRab5                 | <i>Ptub1-trmsgfp-rab5, hyg<sup>R</sup></i>                | This study |
| pTrCpaGFPGcs1                   | <i>Pgcs1- pagfp-gcs1, cbx<sup>R</sup></i>                 | This study |
| pTrHΔHok1                       | <i>Δhok1, hyg<sup>R</sup></i>                             | This study |

p: plasmid; C or cbx<sup>R</sup>, carboxin resistance; TrmsGFP: *T. reesei* codon optimised monomeric superfolder green fluorescent protein; Sso1: a syntaxin-like plasma membrane protein; P: promoter; *tub1*: α-tubulin; H or hyg<sup>R</sup>: hygromycin resistance; Hex1: a major protein in Woronin bodies; TrmCherry: *T. reesei* codon optimised monomeric Cherry; Rab5: small endosomal GTPase; Lifeact: 17 residues from the actin binding protein ABP140p codon optimised for *T. reesei*; TreGFP: *T. reesei* codon optimised monomeric enhanced green fluorescent protein; Sec4: small GTPase; Cal<sup>S</sup>: Signal sequence of calreticulin from rabbit; HDEL: endoplasmic reticulum retention signal; Ktr1: α-1,2-mannosyltransferase; Snc1: synaptobrevin-like vSNARE protein; Exo70: exocyst subunit; Gcs1: glucan synthase; paG or *pagfp*: photo-activatable monomeric green fluorescent protein; Δ: deletion; Hok1: Hook protein in *T. reesei*.

**Supplementary Table 3** Hyphal "core growth units" in filamentous ascomycetes

| Name                  | Length           | Width            | Volume <sup>c</sup> | CGU growth rate <sup>d</sup> | Hyphal growth rate <sup>e</sup> | Relative difference <sup>f</sup> | V/G ratio <sup>g</sup>                 | Reference  |
|-----------------------|------------------|------------------|---------------------|------------------------------|---------------------------------|----------------------------------|----------------------------------------|------------|
|                       | (μm)             | (μm)             | (μm <sup>3</sup> )  | (μm h <sup>-1</sup> )        | (μm h <sup>-1</sup> )           | (%)                              | (μm <sup>3</sup> /1 μm <sup>-1</sup> ) |            |
| <i>T. reesei</i>      | 334 <sup>a</sup> | 2.5 <sup>b</sup> | 1,639.5             | 77 ± 66                      | 191 ± 96                        | 248.1 ↑ <sup>&amp;</sup>         | 21.2                                   | this study |
| <i>A. niger</i>       | 363              | 5.7              | 9,262.9             | 112 ± 6                      | 97 ± 5                          | 13.4 ↓ <sup>&amp;</sup>          | 82.7                                   | 4          |
| <i>P. chrysogenum</i> | 243              | 4.5              | 3,864.7             | 80 ± 4                       | 79 ± 4                          | 1.25 ↓ <sup>&amp;</sup>          | 48.1                                   | 5          |

<sup>a</sup> For dimension of 1<sup>st</sup>, 2<sup>nd</sup> and 3<sup>rd</sup> cell see Table 1 in main text.  
<sup>b</sup> For dimension of 1<sup>st</sup>, 2<sup>nd</sup> and 3<sup>rd</sup> cell see Table 1 in main text.  
<sup>c</sup> Estimated assuming a cylindrical shape ( $V = \pi r^2 h$ ;  $r$  = radius of hypha,  $h$  = length of cell).  
<sup>d</sup> CGU = core growth unit, which comprises all cells that are required for hyphal extension.  
<sup>e</sup> Extension speed of un-wounded hyphae.  
<sup>f</sup> ↓↑ indicate the increase or decrease in extension rate in intact hyphae in percent of the CGU growth rate.  
<sup>g</sup> The volume of all cells in the core growth unit divided by its growth rate.

**Supplementary Table 4** Amino acid sequence analysis of predicted *T. reesei* proteins

| Name         | Accession numbers*                                  |                                     | Domains**                                       | BLAST e-value | Identity/similarity <sup>†</sup> | Reference <sup>§</sup> |
|--------------|-----------------------------------------------------|-------------------------------------|-------------------------------------------------|---------------|----------------------------------|------------------------|
| <b>Hex1</b>  | <i>T. reesei</i><br>XP_006967461.1                  | <i>N. crassa</i><br>XP_963707.1     | IF5A-like_N<br>(3.3e-08)<br>eIF5-a<br>(1.4e-06) | 9e-93         | 61.7/67.8                        | 6                      |
| <b>Rab5</b>  | <i>T. reesei</i><br>XP_006967529.1                  | <i>U. maydis</i><br>XP_011387349.1  | Ras<br>(3.6e-58)                                | 6e-82         | 43.4/48.2                        | 7                      |
| <b>Tub1</b>  | <i>T. reesei</i><br>XP_006963464.1                  | <i>A. nidulans</i><br>XP_657920.1   | Tubulin<br>(1.7e-61)<br>Tubulin_C<br>(2.3e-50)  | 0.0           | 90.2/95.3                        | 8                      |
| <b>Sec4</b>  | <i>T. reesei</i><br>XP_006964176.1                  | <i>S. cerevisiae</i><br>EGA58852.1  | Ras<br>(2.3e-66)                                | 1e-81         | 53.9/73.3                        | 9                      |
| <b>Ktr1</b>  | <i>T. reesei</i><br>XP_006962510.1                  | <i>S. cerevisiae</i><br>AJU11104.1  | Glyco_transf_15<br>(1.9e-133)                   | 4e-155        | 51.7/66.9                        | 10                     |
| <b>Snc1</b>  | <i>T. reesei</i><br>AAT78419.1                      | <i>A. nidulans</i><br>XP_682038.1   | Synaptobrevin<br>(1.6e-32)                      | 9e-39         | 62.9/76.7                        | 11,12                  |
| <b>Exo70</b> | <i>T. reesei</i><br>XP_006962255.1                  | <i>S. cerevisiae</i><br>NP_012450.1 | Exo70<br>(3.4e-96)                              | 5e-44         | 23.5/42.6                        | 13                     |
| <b>Gcs1</b>  | <i>T. reesei</i><br>XP_006965598.1                  | <i>U. maydis</i><br>XP_011387626.1  | FKS1<br>(5.2e-35)                               | 0.0           | 73.3/82.3                        | 14                     |
| <b>Hok1</b>  | <i>T. reesei</i><br>XP_006963103.1 <sup>&amp;</sup> | <i>U. maydis</i><br>XP_761698.1     | None                                            | 9e-11         | 21.8/39.4                        | 15                     |

\*NCBI data base at NCBI (<https://www.ncbi.nlm.nih.gov/protein?cmd=retrieve>)\*\*determined in PfamScan (<https://www.ebi.ac.uk/jdispatcher/pfa/pfamscan>) with error probability in brackets§BLAST done at NCBI (<https://blast.ncbi.nlm.nih.gov/Blast.cgi?PAGE=Proteins>)†given as percentage of amino acid that are identical or similar to the reference sequence, as determined in EMBOSS Needle. ([http://www.ebi.ac.uk/Tools/psa/emboss\\_needle/](http://www.ebi.ac.uk/Tools/psa/emboss_needle/))

§reference for homologue used for comparison

&amp;Annotation lacks the N-terminal 119 amino acids missing

**Supplementary Table 5 Primers used in this study.**

| Name       | Sequence (5' to 3')                                                                  |
|------------|--------------------------------------------------------------------------------------|
| SK-Tri-2   | <i>GCAGTTGAGATGGTGAGGCAGCGGTACAGGCTCATGGAGTTCTCGAGCTTGC</i>                          |
| SK-Tri-3   | <i>CTGTACCGCTGCCTCACCATTCTCAACTGCACGCGGACCTGCCCAAGGG</i>                             |
| SK-Tri-7   | <i>TTTTTACCATTGCTACTCTCTGCGTGACTTGGTCGAAGGCGAATGGACGCG</i>                           |
| SK-Tri-10  | <i>ACTGCTTGAAACACACACAACATGGATTCTCGCCAGCGGAATCGCCTTCTTC</i>                          |
| SK-Tri-11  | <i>ATGGTCAGCAAGGGCGAGGAGC</i>                                                        |
| SK-Tri-18  | <i>ATCCATGACTCCAACAGCAAAAGAAACAGCCTAGTTCTTGTGTTCAAGCGAC</i>                          |
| SK-Tri-19  | <i>GCTGTTTCTTTTGTGTTGGAGTC</i>                                                       |
| SK-Tri-26  | <i>CTTGACAGCTCGTCCATGCCG</i>                                                         |
| SK-Tri-33  | <i>CTCCTCCTTGCTGATGCTCTCGAACTTCTTGATGAGGTGCGGACGCCCAATTGTGGACGATTTTGAGTGTGTTGATC</i> |
| SK-Tri-34  | <i>ATGGGCGTCGCCGACCTCATCAAGAAGTTCGAGAGCATCAGCAAGGAGGAGATGGTCAGCAAGGGCGAGGAGC</i>     |
| SK-Tri-45  | <i>TGGTCGAAGGCGAATGGACGCG</i>                                                        |
| SK-Tri-49  | <i>GGCGCGGCCAGGCGGAGCGGCGAGCAGCAGCGGCACAGGGAGCAACATTGTGGACGATTTTGAGTGTGTTGATC</i>    |
| SK-Tri-50  | <i>ATGTTGCTCCCTGTGCCGCTGCTGCTCGGCCCTGCTCGGCCCTGGCCCGCCCATGGTCAGCAAGGGCGAGGAGC</i>    |
| SK-Tri-51  | <i>AGCAAAAGAAACAGCTTACAGCTCGTCTGCTTGTAGAGCTCGTCCATGCCG</i>                           |
| SK-Tri-52  | <i>CACGACGAGCTGTAAGCTGTTTCTTTTGTGTTGGAGTC</i>                                        |
| SK-Tri-56  | <i>ATCCATGACTCCAACAGCAAAAGAAACAGCTTAGCCGCTGCTGCCGCTGCTGC</i>                         |
| SK-Tri-69  | <i>CCGGGCTCAATCTTGCACTTGAC</i>                                                       |
| SK-Tri-72  | <i>ATCCATGACTCCAACAGCAAAAGAAACAGCCTAGCAGGCACATCCATCCTTGG</i>                         |
| SK-Tri-85  | <i>GAATTCGAGCTCGGTACCCAAC</i>                                                        |
| SK-Tri-86  | <i>GCGTTAACACTAGTCAGATCTACC</i>                                                      |
| SK-Tri-89  | <i>TGGCAGGATATATTGTGGTGTAACAAATTTACCTCCGGTCGATCTGCAATCC</i>                          |
| SK-Tri-91  | <i>TCAGACAGTACATGCATGTTGCATGATGATTGGTGGCCAATCGCTCAATGG</i>                           |
| SK-Tri-94  | <i>TAAACGCTCTTTTCTCTTAGGTTTACCCGCGCAGCATCTCGGCTTCGTTCCG</i>                          |
| SK-Tri-97  | <i>CATGTTGCTCCTCGCCCTTGCTGACCATGATGAGAAAAGTTACTGTGAGAAAGG</i>                        |
| SK-Tri-102 | <i>ACTGGTACAGTGGCGTGATGATG</i>                                                       |
| SK-Tri-112 | <i>ATGGACAGCACCAGAGCCCTC</i>                                                         |
| SK-Tri-127 | <i>ATGGTCAGCAAGGCGGAGGAGG</i>                                                        |
| SK-Tri-129 | <i>CTTGTAGAGCTCGTCCATGCCG</i>                                                        |
| SK-Tri-133 | <i>TAAACGCTCTTTTCTCTTAGGTTTACCCGCGGTTAACACTAGTCAGATCTACC</i>                         |
| SK-Tri-134 | <i>TGGCAGGATATATTGTGGTGTAACAAATTTACTGTTGCTGGCAGGATCTGAAG</i>                         |
| SK-Tri-135 | <i>CAATATCAGTTGGGTACCGAGCTCGAATTTCTCCTCCGTTTAGTTCCTGGTAGCC</i>                       |
| SK-Tri-136 | <i>CACCATGGTAGATCTGACTAGTGTTAACGCGTGAAGCTTGATGCAGTTCATGCT</i>                        |
| SK-Tri-137 | <i>GCCGGTGAAGAGGCTCTCGGTGCTGTCCATGGCGGGCATCTTGGGTGAGAC</i>                           |
| SK-Tri-139 | <i>TAAACGCTCTTTTCTCTTAGGTTTACCCGCAATTAGGATCTTGTGACGCCCTC</i>                         |
| SK-Tri-141 | <i>TTAACAGCACTTGCCGCTGGCG</i>                                                        |
| SK-Tri-167 | <i>TGTACAAGATGGTCAGCAAGGCGGAGGAGG</i>                                                |
| SK-Tri-168 | <i>GCCCTTCTTGACAGCTCGTCCATGCCGCC</i>                                                 |
| SK-Tri-188 | <i>ATGGACAGCACCAGAGCCTCTT</i>                                                        |
| SK-Tri-189 | <i>TGTACAGCCGCTGCTGCCGCT</i>                                                         |
| SK-Tri-191 | <i>ATGGTTCGTCTCTCTCTCTACTGAATGCGAAATTATTAATAGTAATTCCCGGCG</i>                        |
| SK-Tri-192 | <i>GCATTCAGTAGAGAGAGAGAGCG</i>                                                       |
| SK-Tri-193 | <i>CGAAACACTATCAGTCAACCACTC</i>                                                      |
| SK-Tri-194 | <i>AAGTTTGAGTGGTTGACTGATAGTGTTCGTGGGTGGCCAATCGCTCAATGG</i>                           |
| SK-Tri-195 | <i>AGCACCGCGGCATGGACAGCTGTACAAGATGTCGGGATATCCTGGCGGCG</i>                            |
| SK-Tri-207 | <i>ATGGACAGCACCAGAGCCTCT</i>                                                         |
| SK-Tri-208 | <i>GCCGCTGCTGCCGCTGCTGC</i>                                                          |
| SK-Tri-209 | <i>ATCACCACCGCAGCAGCGGCAGCAGCGGCATGGCGGAAGCTCCCAAGCCCA</i>                           |
| SK-Tri-215 | <i>TGGCAGGATATATTGTGGTGTAACAAATTTGCCGAACGCGCAGTGGAGTG</i>                            |
| SK-Tri-216 | <i>CAATATCAGTTGGGTACCGAGCTCGAATTTCTCGCCGACATATATGTAGTCA</i>                          |
| SK-Tri-217 | <i>CACCATGGTAGATCTGACTAGTGTTAACGCGATTCAAGGGGTGGGCTTCATCT</i>                         |
| SK-Tri-218 | <i>TAAACGCTCTTTTCTCTTAGGTTTACCCGCGAGGGCCTCGATGCCATGCTG</i>                           |
| SK-Tri-219 | <i>GAATTCGAGCTCGGTACCCAAC</i>                                                        |
| SK-Tri-220 | <i>GCGTTAACACTAGTCAGATCTACC</i>                                                      |
| SK-Tri-221 | <i>GATCGCGTGTAAGAGAGCGGAG</i>                                                        |
| SK-Tri-222 | <i>CTAAGAAGACTCCTCTCGGAAGAG</i>                                                      |
| SK-Tri-276 | <i>ATCACCACCGCAGCAGCGGCAGCAGCGGCATGCGTGAGGTTATCAGCATCAAC</i>                         |
| SK-Tri-314 | <i>TGGCAGGATATATTGTGGTGTAACAAATTCGAGAGAGCAACGCGTGCCGT</i>                            |
| SK-Tri-315 | <i>CAATATCAGTTGGGTACCGAGCTCGAATTCGAGCCACCCGTGAACAGAGATC</i>                          |
| SK-Tri-316 | <i>CACCATGGTAGATCTGACTAGTGTTAACGCGCCGGCTTCAGCTGCCGTGG</i>                            |
| SK-Tri-317 | <i>GGTGAAGAGCTCCTCGCCCTTGCTGACCATGACGCGTGACGCGGCGAATCG</i>                           |
| SK-Tri-318 | <i>ATCACCCTCGGCATGGACGAGCTCTACAAGATGGCTGTGCGGGCGCTGTCC</i>                           |
| SK-Tri-319 | <i>TAAACGCTCTTTTCTCTTAGGTTTACCCGCCATGTAGCAGTCGGTGGTAAGGTA</i>                        |
| SK-Tri-326 | <i>CGAAGAATCCTTCAAGGCTTTTGAG</i>                                                     |
| SK-Tri-327 | <i>CGCCGAGAGAGATCATGATGCTC</i>                                                       |
| SK-Tri-330 | <i>CTTGTAGAGCTCGTCCATGCCGA</i>                                                       |
| SK-Tri-365 | <i>TGGCAGGATATATTGTGGTGTAACAAATTTACCGCCACATGTGCCGCTTCG</i>                           |
| SK-Tri-366 | <i>GGTGAAGAGCTCCTCGCCCTTGCTGACCATGTCTTGCTGGTTCTCCAGCCT</i>                           |
| SK-Tri-367 | <i>CACCATGGTAGATCTGACTAGTGTTAACGCGCAAGTCGGGAGCTTTGACGAA</i>                          |
| SK-Tri-368 | <i>TAAACGCTCTTTTCTCTTAGGTTTACCCGCGAAGCAACCTCAACCAAGTCC</i>                           |
| SK-Tri-409 | <i>CACGCGCAGCAGCGGCAGCAGCGGCTGTACAATGCCTAGCAATCGCAACTACGAC</i>                       |
| SK-Tri-412 | <i>CTCAGATCAAACTCTCAAAATCGTCCACATGGGTTACTACGACGACGAGGG</i>                           |
| SK-Tri-413 | <i>GCCGGTGAAGAGGCTCTCGGTGCTGTCCATCAGGCGAGAGCCGTGGACGAC</i>                           |
| SK-Tri-416 | <i>ATCACCACCGCAGCAGCGGCAGCAGCGCATGTGAGCGGGCAGAACTCTTA</i>                            |
| SK-Tri-437 | <i>GCATTCAGTAGAGAGAGAGAGCG</i>                                                       |
| SK-Tri-438 | <i>CGAAACACTATCAGTCAACCACTC</i>                                                      |
| SK-Tri-445 | <i>GATCCGCCAGGTCGAGGATCG</i>                                                         |
| SK-Tri-453 | <i>GTACCATCCGTCTCCGACGCG</i>                                                         |
| SK-Tri-454 | <i>GTGCCAACAGAAATCTGTGACTAAC</i>                                                     |
| SK-Tri-455 | <i>AGTGGCGCTGTGATTAATTCGCC</i>                                                       |
| SK-Tri-567 | <i>TTGCCCTTTCTCAGGTAACCTTTTCTCTCATCCATGGTGAGCAAGGGCGAGGAGC</i>                       |
| SK-Tri-568 | <i>GCCGCCACGCGCCGAGGATATCCCGACATAGCTGTGACAGCTCGTCCATGCCG</i>                         |
| SK-Tri-576 | <i>TGGCAGGATATATTGTGGTGTAACAAATTAATGTCTCTCTTGCTGCATCAGCG</i>                         |
| SK-Tri-579 | <i>GCCGGTGAAGAGGCTCTCGGTGCTGTCCAATTTGAGAGAATAAGGCGTTCAGAGG</i>                       |
| SK-Tri-580 | <i>CACGCGCAGCAGCGGCAGCAGCGGCTGTACAATGGCCGACGCTCCGTACGATC</i>                         |
| SK-Tri-581 | <i>TAAACGCTCTTTTCTCTTAGGTTTACCCGCTGGTAGCTCACCTGATGGAACGAT</i>                        |
| SK-Tri-582 | <i>ATGGTTCGTCTCTCTCTCTACTGAATGCTGGGCTCATCGAAGATCTCGG</i>                             |
| SK-Tri-583 | <i>AGTTTGAGTGGTTGACTGATAGTGTTCGTTGTTCCCGAACAGGTACAGTCAGA</i>                         |
| SK-Tri-584 | <i>CATGTTGCTCCTCGCCCTTGCTGACCAATTTGAGAGAATAAGGCGTTCAGAGG</i>                         |
| SK-Tri-585 | <i>AGCACCGCGGCATGGACGAGCTCTACAAGATGGCCGACGCTCCGTACGATC</i>                           |
| SK-Tri-586 | <i>GGACGCCACCACTGACAC</i>                                                            |
| SK-Tri-587 | <i>ACTCTCATGGCACAGAACCTTC</i>                                                        |

*Italics indicates complementary gene sequence, allowing homologous recombination in S. cerevisiae.*

## Supplementary Figures and Figure Legends

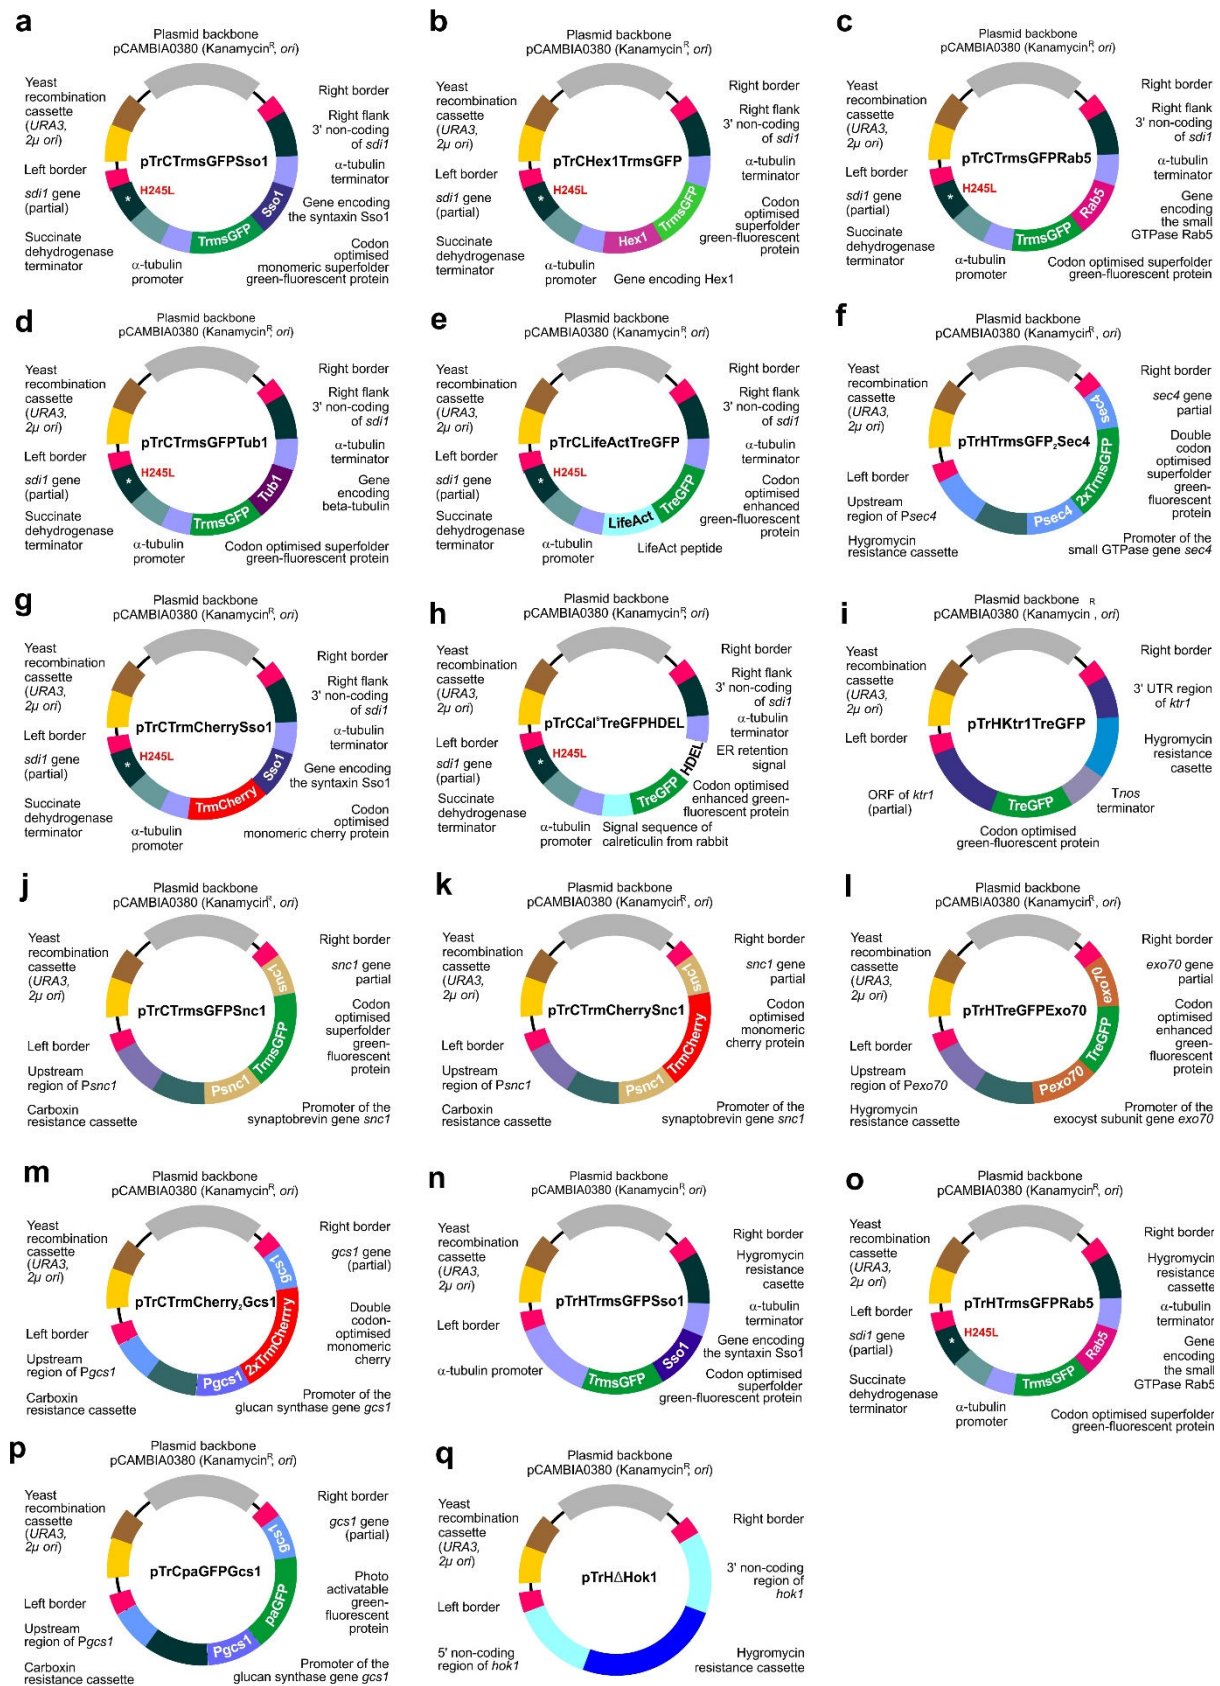

**Supplementary Figure 1** Organisation of the cloning vectors.

**a** Plasmid pTrCTrmsGFPSso1 carries a fusion of codon-optimised superfolder *gfp* (TrmsGFP<sup>3</sup>) and a homologue of the plasma membrane syntaxin gene *sso1*<sup>12</sup>.

**b** Plasmid pTrCHex1TrmsGFP expresses a fluorescent version of the Woronin body protein Hex1<sup>6</sup>.

**c** Plasmid pTrCTrmsGFPRab5 introduces a fluorescent version of a homologue of the endocytic small GTPase Rab5, which localises to rapidly moving fungal EEs<sup>7</sup>.

**d** Plasmid pTrCTrmsGFPTub1 carries a fusion of codon-optimised superfolder *gfp* (TrmsGFP<sup>3</sup>) and a homologue of  $\alpha$ -tubulin encoding gene *tub1*.

**e** Plasmid pTrCLifeactTreGFP carries the 17 aa of the *S. cerevisiae* actin binding protein ABP140 encoding sequence<sup>16</sup>, fused to the *T. reesei* codon-optimised enhanced *gfp* (TreGFP<sup>3</sup>).

**f** Plasmid pTrHTrmsGFP<sub>2</sub>Sec4 carries a double *T. reesei* codon-optimised monomeric super-folder *gfp* (TrmsGFP) fused to the promoter and a part of the *sec4* gene, encoding a homologue of the small GTPase Sec4, which localises to SVs<sup>9,17,18</sup>.

**g** Plasmid pTrCTrmCherrySso1 carries a fusion of codon-optimised *mCherry* (TrmCherry<sup>3</sup>) and a homologue of the plasma membrane syntaxin gene *sso1*<sup>12</sup>.

**h** Plasmid pTrCCal<sup>s</sup>TreGFPHDEL carries the 17 aa of the calreticulin from rabbit Cal<sup>s</sup> and ER retention signal HDEL<sup>19</sup> fused to the *T. reesei* codon-optimised enhanced *gfp* (TreGFP<sup>3</sup>). Similar constructs successfully labelled the ER in *Ustilago maydis*<sup>20</sup> and *Zymoseptoria tritici*<sup>21</sup>.

**i** Plasmid pTrHKtr1TreGFP carries a fusion of *ktr1* encoding a homologue of the  $\alpha$ -1,2-mannosyltransferase Ktr1p in *S. cerevisiae*<sup>10</sup> and codon optimised enhanced *gfp* (TreGFP<sup>3</sup>).

**j** Plasmid pTrCTrmsGFPSnc1 carries a *T. reesei* codon-optimised superfolder *gfp* (TrmsGFP) fused to the promoter and a part of the *snc1* gene, encoding a synaptobrevin like V-SNARE SNC1, which localises to SVs<sup>12</sup>.

**k** Plasmid pTrCTrmCherrySnc1 carries a *T. reesei* codon-optimised monomeric *Cherry* (TrmCherry) fused to the promoter and a part of the *snc1* gene, encoding a synaptobrevin like V-SNARE SNC1, which localises to SVs<sup>12</sup>.

**l** Plasmid pTrHTreGFPExo70 carries a fusion of *exo70* encoding a homologue of the exocyst subunit Exo70 in *S. cerevisiae*<sup>13</sup> and codon optimised enhanced *gfp* (TreGFP<sup>3</sup>).

**m** Plasmid pTrCTrmCherry<sub>2</sub>Gcs1 carries a double *T. reesei* codon-optimised *mCherry* (TrmCherry) fused to the part of the *gcs1* gene, encoding a homologue of the 1,3- $\beta$ -glucan synthase Gcs1 in *U. maydis*, which localises to SVs<sup>14</sup>.

**n** Plasmid pTrHTrmsGFPSso1 carries a fusion of codon-optimised superfolder *gfp* (TrmsGFP) and a homologue of the plasma membrane syntaxin gene *sso1*.

**o** Plasmid pTrHTrmsGFPRab5 introduces a fluorescent version of a homologue of the endocytic small GTPase Rab5, which localises to rapidly moving fungal EEs<sup>7</sup>.

**p** Plasmid pTrCpaGFPGcs1 carries a photo-activatable *gfp* (paGFP<sup>22</sup>) fused to the part of the *gcs1* gene, encoding a putative 1,3- $\beta$ -glucan glucan synthase.

**q** Plasmid pTrH $\Delta$ Hok1 carries the hygromycin resistance cassette, the promoter sequence and a downstream sequence of a homologue of the endosomal motor adapter *hok1*<sup>15</sup>, which enables integration into the *hok1* locus, thereby deleting the *hok1* open reading frame.

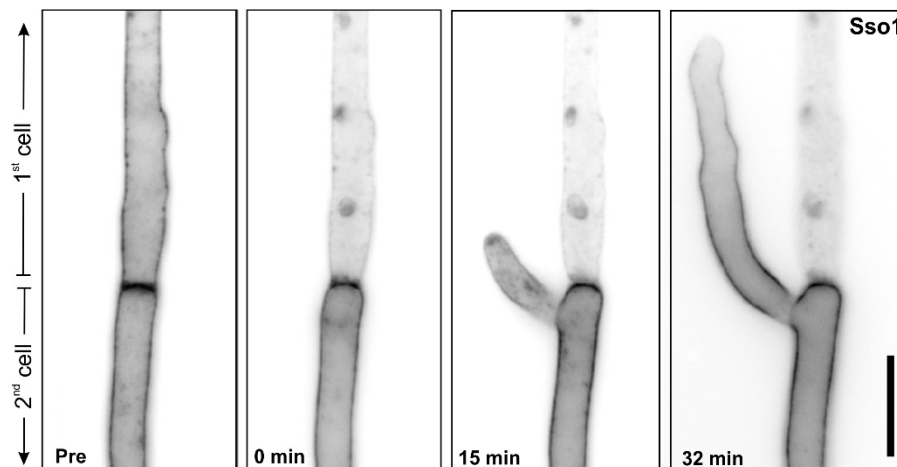

**Supplementary Figure 2** Re-establishment of a growing tip cell after laser injury of the 1<sup>st</sup> cell (0 min). The tip cell was injured by a laser pulse. Within a few minutes, the 2<sup>nd</sup> cell establishes a new growth point and forms a growing tip cell. Images are contrast-inverted; time is given in minutes. Scale bar= 10  $\mu$ m. Results shown in were confirmed in 2 independent experiments. All data are provided in the Source Data File.



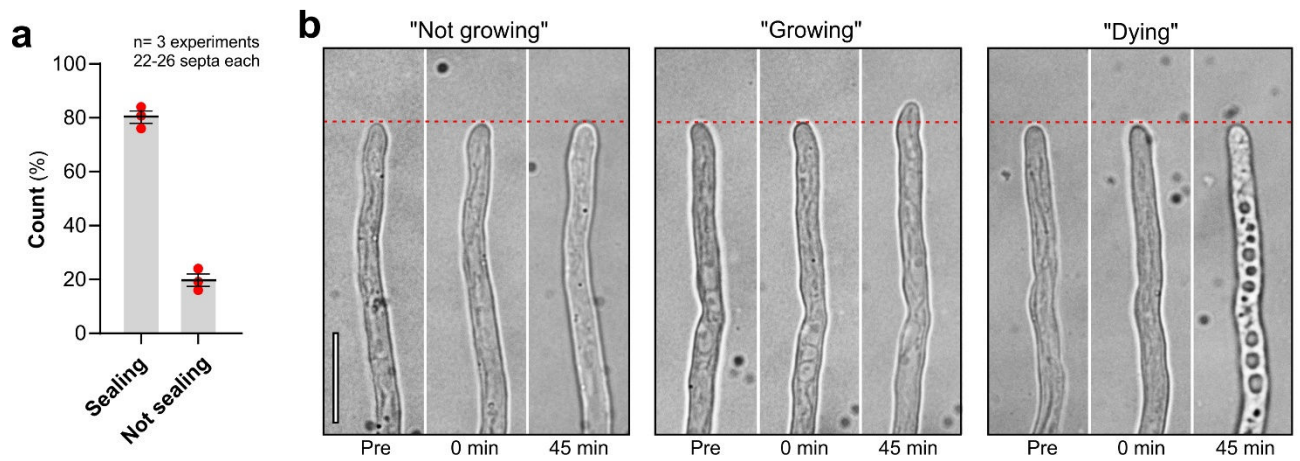

**Supplementary Figure 3** Response of *T. reesei* tip cells to laser injury of the 2<sup>nd</sup> cell.

**a** Graph showing the number of hyphae that were sealing the first septum after injury of the 2<sup>nd</sup> cell. Sample size n= 3 independent experiments with 22-26 septa per experiment.

**b** Phenotype of tip cells before, shortly after and 45 minutes after injury of the 2<sup>nd</sup> cell. The 3 phenotypes are used in the main Fig. 1k. Scale bar= 10  $\mu$ m.

Results shown in (**b**) were confirmed in 3 independent experiments. Bars in (**a**) represent mean  $\pm$  SEM, average of individual experiments shown as red dots. All data are provided in the Source Data File.

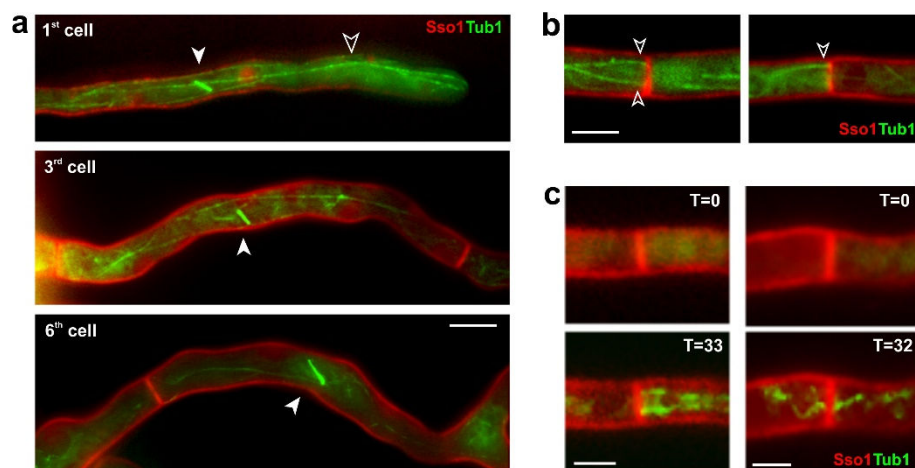

**Supplementary Figure 4** Mitotic spindles in subapical cells and MT nucleation at septa.

**a** Mitotic spindles in hyphal cells of *T. reesei*. Note that the shown apical cell (1<sup>st</sup> cell) contains bundles of MTs (open arrowhead) and a spindle (closed arrowhead). Spindles are also present in subapical cells (3<sup>rd</sup> and 6<sup>th</sup> cell). Scale bar= 5  $\mu$ m.

**b** MTs ending at septa. The tip of the hypha is located to the right. Scale bar= 3  $\mu$ m.

**c** Reappearance of MTs at a septum after benomyl treatment and washout of the inhibitor. No MTs are found after 30 min incubation with 12  $\mu$ M benomyl (T=0); faint MTs appear at the septum after extended time in fresh medium (T=32, T=33). This result suggests the existence of septal microtubule-organising centres. Scale bars= 2  $\mu$ m.

Results shown in (a,c) were confirmed in 2 independent experiments, in (b) in 3 independent experiments. All data are provided in the Source Data File.

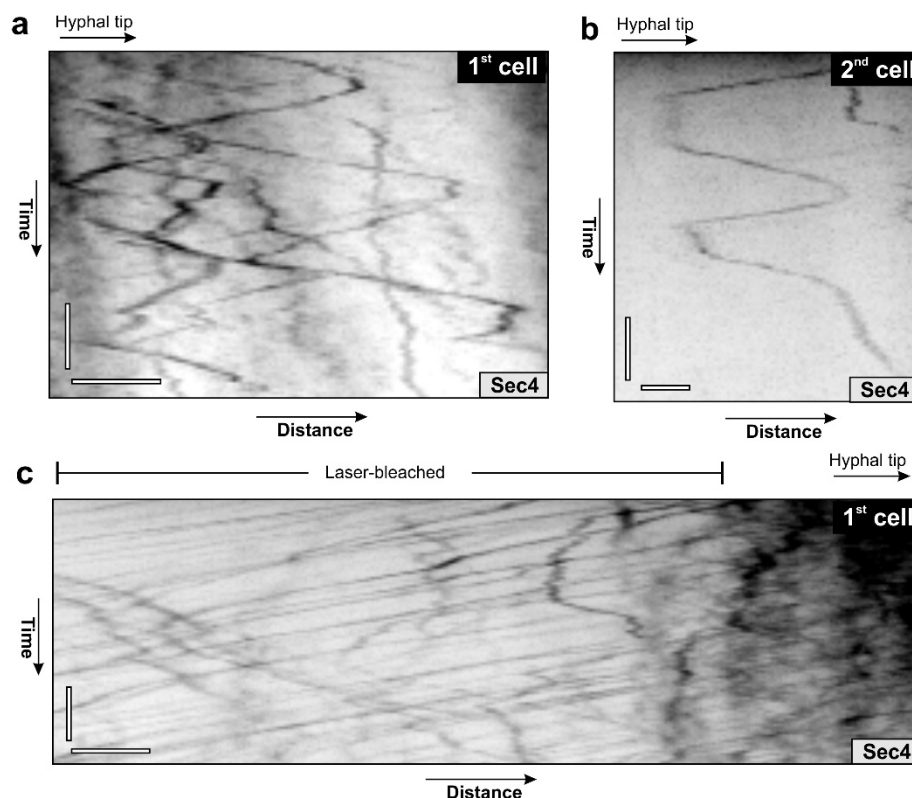

**Supplementary Figure 5** Motility of a SVs in *T. reesei* hyphal cells.

**a** Bi-directional motility of SVs, labelled with TrmsGFP<sub>2</sub>-Sec4, in the middle region of a 1<sup>st</sup> cell. Horizontal scale bar= 1  $\mu$ m; vertical scale bar= 3 s.

**b** Bi-directional motility of SVs, labelled with TrmsGFP<sub>2</sub>-Sec4, in a subapical 2<sup>nd</sup> cell. Horizontal scale bar= 1  $\mu$ m; vertical scale bar= 3 s.

**c** Retrograde motility of SVs, labelled with TrmsGFP<sub>2</sub>-Sec4, at ~25-40  $\mu$ m behind the hyphal tip; photo-bleached region is indicated above image. Horizontal scale bar= 1  $\mu$ m; vertical scale bar= 3 s.

All kymographs are contrast-inverted; Results shown were confirmed in 3 independent experiments. Data are provided in the Source Data File.

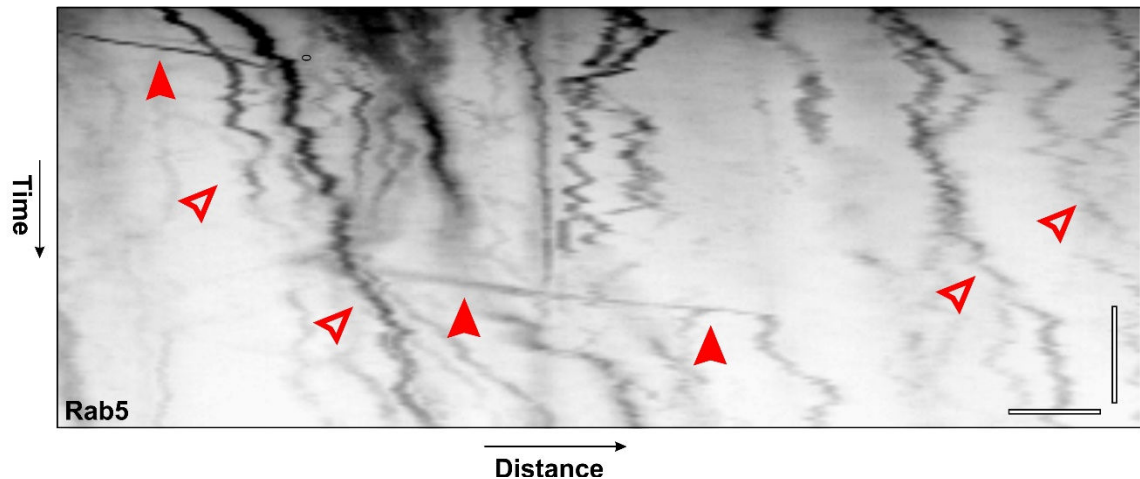

**Supplementary Figure 6** Contrast-inverted kymograph of EE motility. TrmsGFP-Rab5-positive organelles show diffusional behaviour (open arrowheads) and rapid directed motility closed arrowhead. Horizontal scale bar= 2  $\mu$ m, vertical scale bar= 5 s. Results shown confirmed in 3 independent experiments. Data were obtained from growing hyphae and are provided in the Source Data File.

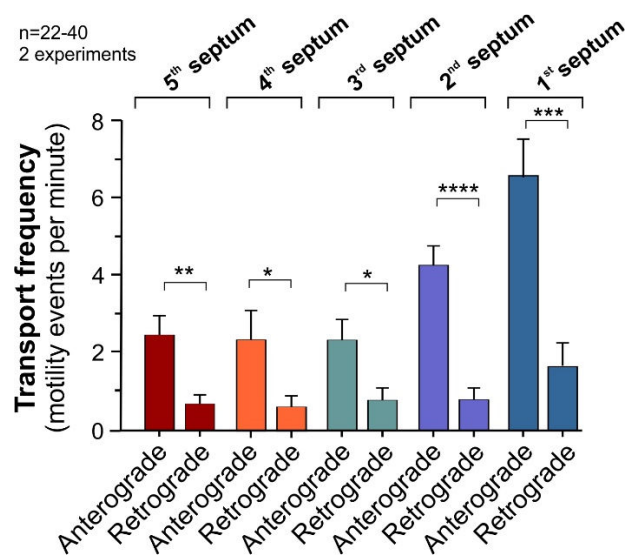

**Supplementary Figure 7** Analysis of anterograde and retrograde cross-septum EE motility. Data are shown as mean  $\pm$  SEM. Statistical testing used Student's t-test with Welch correction; \* = two-tailed P value of 0.0235 (3<sup>rd</sup> septum) and 0.0446 (4<sup>th</sup> septum); \*\* = two-tailed P values of 0.0035; \*\*\* = two-tailed P value of 0.0002; \*\*\*\* = two-tailed P values < 0.0001. Sample size n = 22 septum (1<sup>st</sup>), n = 35 septum (2<sup>nd</sup> and 3<sup>rd</sup>), n = 34 septum (4<sup>th</sup>) and n = 37 septum (5<sup>th</sup>) from 2 independent experiments. All data were obtained from growing hyphae and are provided in the Source Data File.

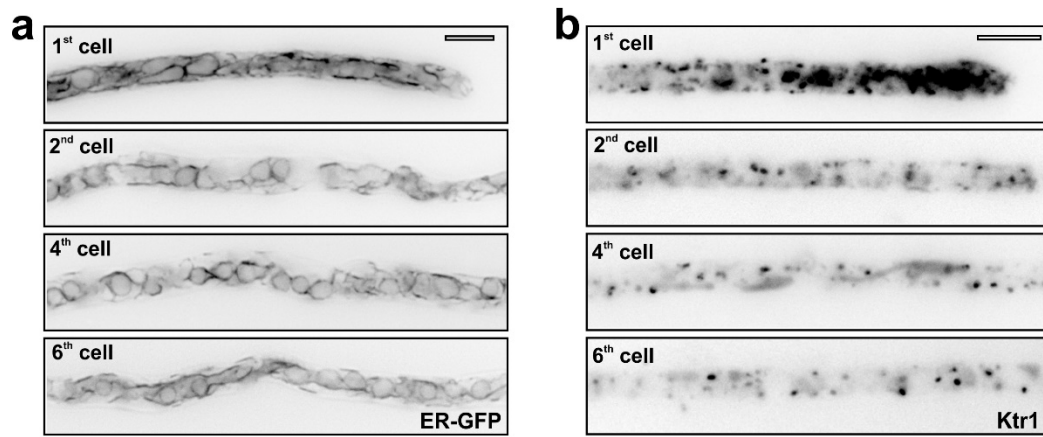

**Supplementary Figure 8** The ER and the Golgi complex in apical and subapical hyphal cells.

**a** Contrast-inverted images of the endoplasmic reticulum marker ER-GFP (Cal<sup>s</sup>-TreGFP-HDEL) in the 1<sup>st</sup> cell and in the 2<sup>nd</sup>, 4<sup>th</sup> and 6<sup>th</sup> cell. Scale bar= 5  $\mu$ m.

**b** Contrast-inverted images of the Golgi marker TrKtr1-TreGFP localisation in the 1<sup>st</sup> cell and in the 2<sup>nd</sup>, 4<sup>th</sup> and 6<sup>th</sup> cell. Scale bar= 5  $\mu$ m.

Results shown were confirmed independently in 2 experiments. All data are provided in the Source Data File.

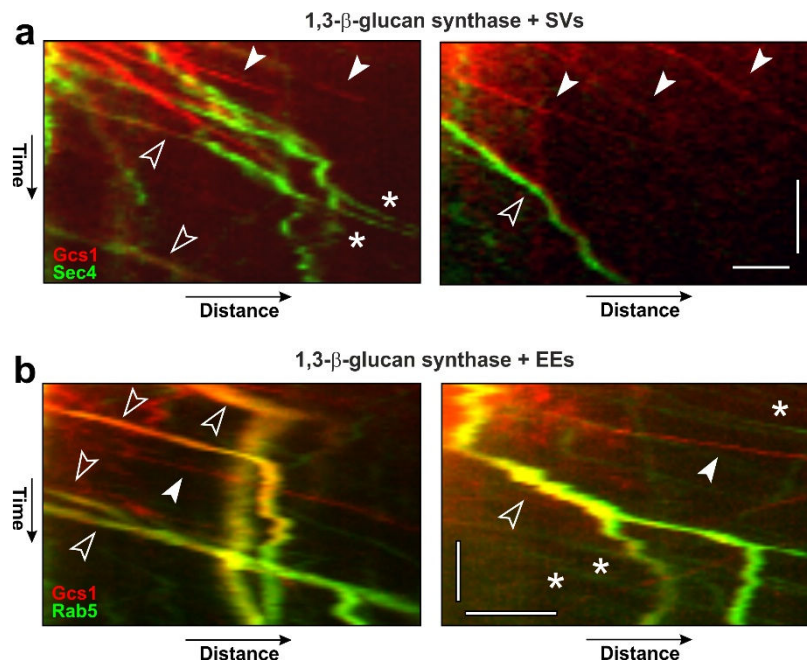

**Supplementary Figure 9** Motility of fluorescent 1,3- $\beta$ -glucan synthase and SVs and EEs.

**a** Kymographs showing SVs, labelled with TrmsGFP<sub>2</sub>-Sec4 (green) and *T. reesei* 1,3- $\beta$ -glucan synthase (TrmCherry<sub>2</sub>-Gcs1; red) in a hyphal cell.

While some signal co-travel (open arrowhead), other TrmCherry<sub>2</sub>-Gcs1 do not co-localise with TrmsGFP<sub>2</sub>-Sec4, suggesting that these cell-wall synthases are not delivered to the apex by SVs. Open arrowheads: 1,3- $\beta$ -glucan synthase in SVs (yellow); closed arrowheads: 1,3- $\beta$ -glucan synthase travelling independent of SVs; asterisk: SVs travelling without 1,3- $\beta$ -glucan synthase. Horizontal scale bar= 2  $\mu$ m; vertical scale bar= 3 s. See also Supplementary Movie 12.

**b** Kymographs showing EEs, labelled with TrmsGFP-Rab5 (EEs; green) and 1,3- $\beta$ -glucan synthase (TrmCherry<sub>2</sub>-Gcs1; red); open arrowheads: 1,3- $\beta$ -glucan synthase in EEs (yellow); closed arrowheads: 1,3- $\beta$ -glucan synthase travelling independent of EEs; asterisk: EEs travelling without 1,3- $\beta$ -glucan synthase. Horizontal scale bar= 2  $\mu$ m; vertical scale bar= 3 s. See also Supplementary Movie 15 and 16.

Results shown were confirmed in 3 independent experiments. All data are provided in the Source Data File.

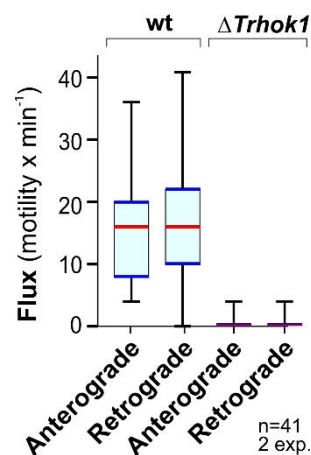

### Supplementary Figure 10 Frequency of EE motility in $\Delta$ Trhok1 mutants.

Quantitative analysis of bi-directional EE motility in wildtype strain QM6a (WT) and a *hok1* deletion mutant ( $\Delta$ hok1). Data sets did not pass a normality test (Shapiro-Wilk test,  $P > 0.05$ ) and thus are given as Whiskers' plots (blue lines: 25/75 percentiles; red line: median; minimum and maximum at whiskers ends). Sample size  $n = 41$  hyphae from 2 independent experiments. All data are provided in the Source Data File.

## Supplementary Methods

**pTrCTrmsGFPSso1.** Plasmid pTrCTrmsGFPSso1 (Supplementary Fig. 1a) was obtained by *in vivo* yeast recombination of the following fragments: (i) a 12,849 bp fragment of plasmid pTrCTrmsGFP<sup>3</sup> (digested with *Bbv*CI and *Xba*I), (ii) a 714 bp *trmsgfp* (without stop codon; amplified with primers SK-Tri-207 and SK-Tri-208 from plasmid pTrCTrmsGFP) (See Supplementary Table 5 for all the primers), (iii) a 1245 bp *T. reesei* full-length *sso1* gene (with stop codon; amplified with primers SK-Tri-416 and SK-Tri-18 from QM6a genomic DNA), and (iv) a 1049 bp *T. reesei tub1* terminator (amplified with primers SK-Tri-19 and SK-Tri-10 from plasmid pTrCTrmsGFP).

**pTrCHex1TrmsGFP.** Plasmid pTrCHex1TrmsGFP (Supplementary Fig. 1b) was obtained by *in vivo* yeast recombination of the following fragments: (i) a 12,866 bp fragment of plasmid pTrCTrmCherry<sup>3</sup> (digested with *Bst*EII), (ii) a 781 bp *T. reesei* full-length *hex1* gene (without stop codon; amplified with primers SK-Tri-412 and SK-Tri-413 from QM6a genomic DNA), (iii) a 717 bp *trmsgfp* (with stop codon; amplified with primers SK-Tri-112 and SK-Tri-56 from plasmid pTrCTrmsGFP), and (iv) a 1049 bp *T. reesei tub1* terminator (amplified with primers SK-Tri-19 and SK-Tri-10 from plasmid pTrCTrmsGFP).

**pTrCTrmsGFPRab5.** Plasmid pTrCTrmsGFPRab5 (Supplementary Fig. 1c) was obtained by *in vivo* yeast recombination of the following fragments: (i) a 12,849 bp fragment of pTrCTrmsGFP (digested with *Bbv*CI and *Xba*I), (ii) a 714 bp *trmsgfp* (without stop codon; amplified with primers SK-Tri-207 and SK-Tri-208 from plasmid pTrCTrmsGFP), (iii) a 825 bp *T. reesei* full-length *rab5* gene (with stop codon; amplified with primers SK-Tri-209 and SK-Tri-72 from QM6a genomic DNA), and (iv) a 1049 bp *T. reesei tub1* terminator (amplified with primers SK-Tri-19 and SK-Tri-10 from plasmid pTrCTrmsGFP).

**pTrCTrmsGFPTub1.** Plasmid pTrCTrmsGFPTub1 (Supplementary Fig. 1d) was obtained by *in vivo* yeast recombination of the following fragments: (i) a 12,849 bp fragment of pTrCTrmsGFP (digested with *Bbv*CI and *Xba*I), (ii) a 714 bp *trmsgfp* (without stop codon; amplified with primers SK-Tri-207 and SK-Tri-208 from plasmid pTrCTrmsGFP), (iii) a 1932 bp *T. reesei* full-length *tub1* gene with stop codon and a 1049 bp *T. reesei tub1* terminator (amplified as one fragment with primers SK-Tri-276 and SK-Tri-10 from QM6a genomic DNA).

**pTrCLifeactTreGFP.** Plasmid pTrCLifeactTreGFP (Supplementary Fig. 1e) was obtained by *in vivo* yeast recombination of the following fragments: (i) a 11,939 bp fragment of pTrCTreGFP (digested with *Bsr*GI), (ii) a 1018 bp *T. reesei tub1* promoter (amplified with primers SK-Tri-7 and SK-Tri-33 from plasmid pTrCTreGFP<sup>3</sup>), and (iii) a 720 bp *tregfp* (with stop codon) and 1049 bp *T. reesei tub1* terminator (amplified as one fragment with primers SK-Tri-34 and SK-Tri-10 from plasmid pTrCTreGFP). Note that chimeric primers SK-Tri-33 and SK-Tri-34 contain 17 amino acid lifeact sequences with *T. reesei*-codon optimised nucleotides.

**pTrHTrmsGFP<sub>2</sub>Sec4.** Plasmid pTrHTrmsGFP<sub>2</sub>Sec4 (Supplementary Fig. 1f) contains 2x *trmsgfp* fused to partial *T. reesei sec4* gene for targeted integration into the *sec4* locus of *T. reesei* using hygromycin as selection agent. To this end, first plasmid pTrHTrmsGFPSec4 was generated. Plasmid pTrHTrmsGFPSec4 was obtained by *in vivo* yeast recombination of the following fragments: (i) a 9958 bp fragment of pGΔWco1<sup>23</sup> (digested with *Xho*I), (ii) a 820 bp left flank covering the upstream of the *sec4* promoter sequence (amplified with SK-Tri-134 and SK-Tri-135 from QM6a genomic DNA), (iii) a 1510 bp of hygromycin resistance cassette (amplified with primers SK-Tri-85 and SK-Tri-86 from plasmid pCHyg-YR<sup>24</sup>); (iv) a 1000 bp of *sec4* promoter (amplified with SK-Tri-136 and SK-Tri-137 from QM6a genomic DNA), (v) a 720 bp *trmsgfp* (without stop codon; amplified with primers SK-Tri-188 and SK-Tri-189 from plasmid pTrCTrmsGFP), and (vi) a 800 bp 5' end of *sec4* gene (amplified with primers SK-Tri-409 and SK-Tri-139 from QM6a genomic DNA).

The single *trmsgfp* in plasmid pTrHTrmsGFPSec4 was replaced by 2x *trmsgfp* by conventional ligation method using T4 DNA ligase (New England Biolabs, Ipswich, UK). To this end, the 2x *trmsgfp* tag together with *Nco*I and *Bsr*GI restriction site sequences at the beginning and end of the 2x*trmsgfp*, respectively, was synthesised commercially (DNA 2.0, Menlo Park, CA, USA) resulting in pEX-K248-2xTrmsGFP. Plasmid pTrHTrmsGFP<sub>2</sub>Sec4 (Supplementary Fig. 1f) was obtained by conventional ligation of the following fragments: (i) a 12,117 bp fragment of pTrHTrmsGFPSec4 (digested with *Bsr*GI and *Mlu*I), (ii) a 1002 bp fragment of pTrHTrmsGFPSec4 (digested with *Mlu*I and *Nco*I), and (iii) a 1,430 bp fragment of pEX-K248-2xTrmsGFP (digested with *Nco*I and *Bsr*GI).

**pTrCTrmCherrySso1.** Plasmid pTrCTrmCherrySso1 (Supplementary Fig. 1g) was obtained by *in vivo* yeast recombination of the following fragments: (i) a 12,849 bp fragment of plasmid pTrCTrmsGFP; (digested with *Bbv*CI and *Xba*I), and (ii) a 708



bp *trmCherry* without stop codon and a 1245 bp *T. reesei* full-length *sso1* gene with stop codon (amplified as one fragment with primers SK-Tri-69 and SK-Tri-18 from plasmid pTrHTrmCherrySso1).

**pTrCCal<sup>s</sup>TreGFPHDEL.** Vector pTrCCal<sup>s</sup>TreGFPHDEL (Supplementary Fig. 1h) was obtained by *in vivo* yeast recombination of the following fragments: (i) a 11,939 bp fragment of pTrCTreGFP (digested with *BsrGI*), (ii) a 1018 bp *T. reesei tub1* promoter (amplified with primers SK-Tri-45 and SK-Tri-49 from plasmid pTrCTreGFP), (iii) a 51 bp Cal<sup>s</sup>, 717 bp *tregfp* and 12 bp encoding HDEL (Cal<sup>s</sup>TreGFPHDEL sequence; amplified with SK-Tri-50 and SK-Tri-51 from plasmid pTrCTreGFP) and (iv) a 1049 bp *T. reesei tub1* terminator (amplified with primers SK-Tri-52 and SK-Tri-10 from plasmid pTrCTreGFP). Note that chimeric primers SK-Tri-49 and SK-Tri-50 contain 17 amino acid sequence of calreticulin from rabbit (Cal<sup>s</sup>), whilst the chimeric primers SK-Tri-51 and SK-Tri-52 contain 4 amino acid sequence of ER retention signal HDEL.

**pTrHKtr1TreGFP.** Plasmid pTrHKtr1TreGFP contains *tregfp* fused to partial *T. reesei ktr1* gene for targeted integration into the *ktr1* locus of *T. reesei* using hygromycin as selection agent (Supplementary Fig. 1i). It was obtained by *in vivo* yeast recombination of the following fragments: (i) a 9489 bp fragment of pTrHEB1TreGFP<sup>3</sup> (digested with *BamHI* and *Sall*), (ii) a 2973 bp fragment of pTrHEB1TreGFP<sup>3</sup> (digested with *BamHI* and *Sall*), (iii) a 814 bp of 3' end of *ktr1* gene (without stop codon; amplified with primers SK-Tri-365 and SK-Tri-366 QM6a genomic DNA), (iv) a 1510 bp hygromycin resistance cassette (amplified with primers SK-Tri-85 and SK-Tri-86 from plasmid pTrHEB1TreGFP), and (v) a 993 bp *ktr1* right flank covering the downstream of the *ktr1* gene, immediately after the stop codon (amplified with primers SK-Tri-367 and SK-Tri-368 QM6a genomic DNA).

**pTrCTrmsGFPSnc1.** Plasmid pTrCTrmsGFPSnc1 (Supplementary Fig. 1j) contains *trmsgfp* fused to partial *T. reesei snc1* gene for targeted integration into the *snc1* locus of *T. reesei* using carboxin as selection agent. It was obtained by *in vivo* yeast recombination of the following fragments: (i) a 9533 bp fragment plasmid pCZtGFP (digested with *BamHI* and *HindIII*), (ii) a 1000 bp left flank covering the upstream of the *snc1* promoter sequence (amplified with SK-Tri-576 and SK-Tri-582 from QM6a genomic DNA), (iii) a 3194 bp of carboxin resistance cassette (amplified with primers SK-Tri-437 and SK-Tri-438 from plasmid pTrCTrmCherry<sub>2</sub>Gcs1 (this study); (iv) a 1050 bp of *snc1* promoter (amplified with SK-Tri-583 and SK-Tri-579 from QM6a genomic DNA), (v) a 720 bp *trmsgfp* (without stop codon; amplified with primers SK-



Tri-188 and SK-Tri-189 from plasmid pTrCTrmsGFP), and (vi) a 600 bp 5' end of *snc1* gene (amplified with primers SK-Tri-580 and SK-Tri-581 from QM6a genomic DNA).

**pTrCTrmCherrySnc1.** Plasmid pTrCTrmCherrySnc1 (Supplementary Fig. 1k) contains *trmCherry* fused to partial *T. reesei snc1* gene for targeted integration into the *snc1* locus of *T. reesei* using carboxin as selection agent. It was obtained by *in vivo* yeast recombination of the following fragments: (i) a 9533 bp fragment plasmid pCZtGFP (digested with *Bam*HI and *Hind*III), (ii) a 1000 bp left flank covering the upstream of the *snc1* promoter sequence (amplified with SK-Tri-576 and SK-Tri-582 from QM6a genomic DNA), (iii) a 3194 bp of carboxin resistance cassette (amplified with primers SK-Tri-437 and SK-Tri-438 from plasmid pTrCTrmCherry<sub>2</sub>Gcs1 (this study); (iv) a 1050 bp of *snc1* promoter (amplified with SK-Tri-583 and SK-Tri-584 from QM6a genomic DNA), (v) a 708 bp *trmCherry* (without stop codon; amplified with primers SK-Tri-127 and SK-Tri-129 from plasmid pStrataTrmCherry-*Bsr*GI), and (vi) a 600 bp 5' end of *snc1* gene (amplified with primers SK-Tri-585 and SK-Tri-581 from QM6a genomic DNA).

**pTrHTreGFPExo70.** Plasmid pTrHTreGFPExo70 contains *tregfp* fused to partial *T. reesei exo70* gene for targeted integration into the *exo70* locus of *T. reesei* using hygromycin as selection agent (Supplementary Fig. 1l). It was obtained by *in vivo* yeast recombination of the following fragments: (i) a 9958 bp fragment of pGΔWco<sup>123</sup> (digested with *Xho*I), (ii) a 1000 bp left flank covering the upstream of the *exo70* promoter sequence (amplified with SK-Tri-314 and SK-Tri-315 from QM6a genomic DNA), (iii) a 1510 bp of hygromycin resistance cassette (amplified with primers SK-Tri-85 and SK-Tri-86 from plasmid pCHyg-YR<sup>24</sup>); (iv) a 1000 bp of *exo70* promoter (amplified with SK-Tri-316 and SK-Tri-317 from QM6a genomic DNA), (v) a 720 bp *trmsgfp* (without stop codon; amplified with primers SK-Tri-11 and SK-Tri-330 from plasmid pTrCTrmsGFP), and (vi) a 1000 bp 5' end of *exo70* gene (amplified with primers SK-Tri-318 and SK-Tri-319 from QM6a genomic DNA).

**pTrCTrmCherry<sub>2</sub>Gcs1.** Plasmid pTrCTrmCherry<sub>2</sub>Gcs1 (Supplementary Fig. 1m) contains 2x *trmCherry* fused to partial *T. reesei gcs1* gene for targeted integration into the *gcs1* locus of *T. reesei* using carboxin as selection agent. To this end, first plasmid pTrCTrmCherryGcs1 was generated. Plasmid pTrCTrmCherryGcs1 was obtained by *in vivo* yeast recombination of the following fragments: (i) a 9760 bp fragment of plasmid pCGen-YR<sup>24</sup> (digested with *Zra*I and *Xba*I), (ii) a 1010 bp left flank covering the upstream of the *gcs1* promoter sequence (amplified with primers

SK-Tri-89 and SK-Tri-191 from QM6a genomic DNA), (iii) a 3194 bp fragment of carboxin resistance cassette (amplified as two fragments with primers SK-Tri-192 and SK-Tri-2; SK-Tri-3 and SK-Tri-193 from QM6a genomic DNA), (iv) a 1010 bp of *gcs1* promoter (amplified with primers SK-Tri-194 and SK-Tri-97 from QM6a genomic DNA), (v) a 708 bp *trmCherry* (without stop codon; amplified with primers SK-Tri-127 and SK-Tri-26 from plasmid pStrataTrmCherry-*BsrGI*), and (vi) a 1020 bp 5' end of *gcs1* gene (amplified with primers SK-Tri-195 and SK-Tri-94 from QM6a genomic DNA).

The single *trmCherry* in plasmid pTrCTrmCherryGcs1 was replaced by 2x *trmsgfp* by conventional ligation method using T4 DNA ligase (New England Biolabs, Ipswich, UK). To this end, first plasmid pStrataTrmCherry-*BsrGI* was generated to introduce *BsrGI* restriction site sequences at both ends of the *trmCherry* gene. Plasmid pStrataTrmCherry-*BsrGI* was generated by ligating the PCR amplified product of full length 708 bp *trmCherry* gene (amplified with primers pTr-167 and pTr-168 from plasmid pTrCTrmCherry (note that the *BsrGI* restriction site sequences were added to these primers) into a StrataClone PCR cloning plasmid using StrataClone PCR Cloning Kit (Agilent Technologies, CA, USA). Finally, plasmid pTrCTrmCherryGcs1 was digested with *BsrGI* and an additional copy of *trmCherry* was introduced as *BsrGI* fragment (obtained from plasmid pStrataTrmCherry-*BsrGI* by digestion with *BsrGI*) by using T4 DNA ligase (New England Biolabs, Ipswich, UK) resulting in plasmid pTrCTrmCherry<sub>2</sub>Gcs1 (Supplementary Fig. 1m).

**pTrHTrmsGFPSso1.** Plasmid pTrHTrmsGFPSso1 (Supplementary Fig. 1n) was obtained by *in vivo* yeast recombination of the following fragments: (i) a 12,785 bp fragment of plasmid pTrCTrmsGFPRab5 (this study (digested with *AhdI*), (ii) a 1245 bp *T. reesei* full-length *sso1* gene (with stop codon; amplified with primers SK-Tri-416 and SK-Tri-18 from QM6a genomic DNA), and (iii) a 1049 bp *T. reesei tub1* terminator and a 1510 bp hygromycin resistance cassette (amplified as one fragment with primers SK-Tri-19 and SK-Tri-133 from plasmid pTrHTrmCherrySso1<sup>3</sup>).

**pTrHTrmsGFPRab5.** Plasmid pTrHTrmsGFPRab5 (Supplementary Fig. 1o) was obtained by *in vivo* yeast recombination of the following fragments: (i) a 12,785 bp fragment of pTrCTrmsGFPRab5 (this study (digested with *AhdI*), (ii) a 825 bp *T. reesei* full-length *rab5* gene (with stop codon; amplified with primers SK-Tri-209 and SK-Tri-72 from QM6a genomic DNA), and (iii) a 1049 bp *T. reesei tub1* terminator and a 1510 bp hygromycin resistance cassette (amplified as one fragment with primers SK-Tri-19 and SK-Tri-133 from plasmid pTrHTrmCherrySso1).

**pTrCpaGFPGcs1.** Plasmid pTrCpaGFPGcs1 contains *pagfp* fused to partial *T. reesei gcs1* gene for targeted integration into the *gcs1* locus of *T. reesei* using carboxin as selection agent (Supplementary Fig. 1p). Plasmid pTrCpaGFPGcs1 was obtained by *in vivo* yeast recombination of the following fragments: (i) a 14,707 bp fragment of pTrCTrmCherry<sub>2</sub>Gcs1 (this study (digested with *Pml*I and *Bsr*GI), (ii) a 1010 bp of *gcs1* promoter (amplified with SK-Tri-194 and SK-Tri-97 from plasmid pTrCTrmCherry<sub>2</sub>Gcs1), and (iii) a 717 bp *pagfp* (without stop codon; amplified with primers SK-Tri-567 and SK-Tri-568 from plasmid ppaGFP<sub>3</sub>Dyn2<sup>25</sup>).

**pTrHΔHok1.** Plasmid pTrHΔHok1 (Supplementary Fig. 1q) was obtained by *in vivo* yeast recombination of the following fragments: (i) a 9760 bp fragment of pCGEN-YR<sup>24</sup> (digested with *Xba*I and *Zra*I), (ii) a 828 bp *T. reesei hok1* promoter (amplified with primers SK-Tri-215 and SK-Tri-216 from QM6a genomic DNA), (iii) a 1510 bp hygromycin resistance cassette (amplified with primers SK-Tri-219 and SK-Tri-220 from plasmid pCHyg-YR), and (iv) a 856 bp of the non-coding 3' region of *hok1* (amplified with primers SK-Tri-217 and SK-Tri-218 from QM6a genomic DNA).

## Supplementary References

- 1 Reese, E. T. History of the cellulase program at the U.S. army Natick Development Center. *Biotechnol. Bioeng. Symp.*, 9-20 (1976).
- 2 Kilaru, S., Schuster, M., Murray, R. & Steinberg, G. Optimal timing for Agrobacterium-mediated DNA transformation of *Trichoderma reesei* conidia revealed by live cell imaging. *Fungal Genet. Biol.* **142**, 103448 (2020). doi: 10.1016/j.fgb.2020.103448.
- 3 Kilaru, S., Schuster, M., Cannon, S. & Steinberg, G. Optimised red- and green-fluorescent proteins for live cell imaging in the industrial enzyme-producing fungus *Trichoderma reesei*. *Fungal Genet. Biol.* **138**, 103366 (2020). doi: 10.1016/j.fgb.2020.103366.
- 4 Tegelaar, M. & Wösten, H. A. B. Functional distinction of hyphal compartments. *Sci Rep* **7**, 6039 (2017). doi: 10.1038/s41598-017-06422-6.
- 5 Tegelaar, M., van der Lans, G. P. A. & Wösten, H. A. B. Apical but not sub-apical hyphal compartments are self-sustaining in growth. *Antonie Van Leeuwenhoek* **113**, 697-706 (2020). doi: 10.1007/s10482-020-01383-9.
- 6 Tenney, K. *et al.* Hex-1, a gene unique to filamentous fungi, encodes the major protein of the Woronin body and functions as a plug for septal pores. *Fungal Genet. Biol.* **31**, 205-217 (2000). doi: 10.1006/fgbi.2000.1230.
- 7 Fuchs, U., Hause, G., Schuchardt, I. & Steinberg, G. Endocytosis is essential for pathogenic development in the corn smut fungus *Ustilago maydis*. *Plant Cell* **18**, 2066-2081 (2006). doi: 10.1105/tpc.105.039388.
- 8 Morris, N. R., Lai, M. H. & Oakley, C. E. Identification of a gene for alpha-tubulin in *Aspergillus nidulans* *Cell* **16**, 437-442 (1979). doi: 10.1016/0092-8674(79)90019-9.

- 9 Guo, W., Roth, D., Walch-Solimena, C. & Novick, P. The exocyst is an effector for Sec4p, targeting secretory vesicles to sites of exocytosis. *EMBO J.* **18**, 1071-1080 (1999). doi: 10.1093/emboj/18.4.1071.
- 10 Lussier, M., Sdicu, A. M., Bussereau, F., Jacquet, M. & Bussey, H. The Ktr1p, Ktr3p, and Kre2p/Mnt1p mannosyltransferases participate in the elaboration of yeast O- and N-linked carbohydrate chains. *J. Biol. Chem.* **272**, 15527-15531 (1997). doi: 10.1074/jbc.272.24.15527.
- 11 Taheri-Talesh, N. *et al.* The tip growth apparatus of *Aspergillus nidulans*. *Mol Biol Cell* **19**, 1439-1449 (2008). doi: 10.1091/mbc.e07-05-0464.
- 12 Valkonen, M. *et al.* Spatially segregated SNARE protein interactions in living fungal cells. *J. Biol. Chem.* **282**, 22775-22785 (2007). doi: 10.1074/jbc.M700916200.
- 13 TerBush, D. R., Maurice, T., Roth, D. & Novick, P. The Exocyst is a multiprotein complex required for exocytosis in *Saccharomyces cerevisiae*. *EMBO J.* **15**, 6483-6494 (1996). doi: 10.1002/j.1460-2075.1993.tb06093.x.
- 14 Schuster, M. *et al.* Co-delivery of cell-wall-forming enzymes in the same vesicle for coordinated fungal cell wall formation. *Nat. Microbiol.* **1**, 16149 (2016). doi: 10.1038/nmicrobiol.2016.149.
- 15 Bielska, E. *et al.* Hook is an adapter that coordinates kinesin-3 and dynein cargo attachment on early endosomes. *J. Cell Biol.* **204**, 989-1007 (2014). doi: 10.1083/jcb.201309022.
- 16 Riedl, J. *et al.* Lifeact: a versatile marker to visualize F-actin. *Nat. Methods* **5**, 605-607 (2008). doi: 10.1038/nmeth.1220.
- 17 Goud, B., Salminen, A., Walworth, N. C. & Novick, P. J. A GTP-binding protein required for secretion rapidly associates with secretory vesicles and the plasma membrane in yeast. *Cell* **53**, 753-768 (1988). doi: 10.1016/0092-8674(88)90093-1.
- 18 Jones, L. A. & Sudbery, P. E. Spitzenkörper, exocyst, and polarisome components in *Candida albicans* hyphae show different patterns of localization and have distinct dynamic properties. *Eukaryot. Cell* **9**, 1455-1465 (2010). doi: 10.1128/EC.00109-10.
- 19 Pelham, H. R. The retention signal for soluble proteins of the endoplasmic reticulum. *Trends Biochem. Sci.* **15**, 483-486 (1990). doi: 10.1016/0968-0004(90)90303-s.
- 20 Wedlich-Söldner, R., Schulz, I., Straube, A. & Steinberg, G. Dynein supports motility of endoplasmic reticulum in the fungus *Ustilago maydis*. *Mol. Biol. Cell* **13**, 965-977 (2002). doi: 10.1091/mbc.01-10-0475.
- 21 Kilaru, S., Schuster, M., Ma, W. & Steinberg, G.. Fluorescent markers of various organelles in the wheat pathogen *Zymoseptoria tritici*. *Fungal Genet. Biol.* **105**, 16-27 (2017). doi: 10.1016/j.fgb.2017.05.001.
- 22 Patterson, G. H. & Lippincott-Schwartz, J. A photoactivatable GFP for selective photolabeling of proteins and cells. *Science* **297**, 1873-1877 (2002). doi: 10.1126/science.1074952.
- 23 Kilaru, S. *et al.* *Zymoseptoria tritici* white-collar complex integrates light, temperature and plant cues to initiate dimorphism and pathogenesis. *Nat. Commun.* **13**, 5625 (2022). doi: 10.1038/s41467-022-33183-2.
- 24 Kilaru, S. & Steinberg, G. Yeast recombination-based cloning as an efficient way of constructing vectors for *Zymoseptoria tritici*. *Fungal Genet. Biol.* **79**, 76-83 (2015). doi: 10.1016/j.fgb.2015.03.017.
- 25 Schuster, M., Lipowsky, R., Assmann, M. A., Lenz, P. & Steinberg, G. Transient binding of dynein controls bidirectional long-range motility of early endosomes. *Proc. Natl. Acad. Sci. U S A*, 3618-3623 (2011). doi: 10.1073/pnas.1015839108.
